# Supplementary material
Source: PubMed Central journal article supplement (PMC4326710)
Supplement: ejhg2014114x1.pdf [file ejhg2014114x1.pdf]

Figure S1: Each missense mutation in the PAH<sub>vdb</sub> is hyperlinked to an interactive viewer built on the iSee concept

## How to use the interactive viewer in PAH<sub>vdb</sub>





### 1 Access database first time:

<http://www.biopku.org/pah/>

**Visualisation plugin missing**

This is an interactive image. Drag and pull the image with your mouse cursor. Also, use the arrows at the bottom to alternate between mutant and wild-type.

A web plugin is required to see the visualisation. Click on the button to the right to download the free activeICM plugin and to read the installation instructions.

After installation please restart your browser.

Support: [info@sgc.mn.ac.uk](mailto:info@sgc.mn.ac.uk)

**Download activeICM**

**MolSoft**

### 2 Install plugin

You will be taken to the MolSoft site for the installation page.

Identify your operating system and download the active ICM installer.

Follow the instructions to install. Close browser and reopen html



### 3 Navigate viewer

If you are viewing using Internet Explorer 10 you may need to enable Compatibility Mode. Instructions are at <http://windows.microsoft.com/en-gb/internet-explorer/use-compatibility-view#ie=ie-10>

Once the scene is set, you can interact directly within the 3D window

- Hold left mouse button to interact within the 3D window
- There are several 'hot-zones' for certain operations (red boxes in figure below)
- Place cursor in hot-zone, and 'drag' with mouse (press left button and move)

**Left button**

move = rotation

up/down = zoom in/out

up/down = zoom in/out

up/down = clip back plane

up/down = clip back+front planes

up/down = clip front plane



**Right button**

move = selection (markers appear); select empty zones to remove selection



use the left/right arrows to alternate between mutant and wild-type views
