# Supplementary material
Source: PubMed Central journal article supplement (PMC4326710)

Figure S2: Correlations between residual PAH activity (%PAH) and FoldX (A), SNPs3D (B), SIFT Blink (C) and PolyPhen-2 values (D) for missense mutations in the *PAHdb*

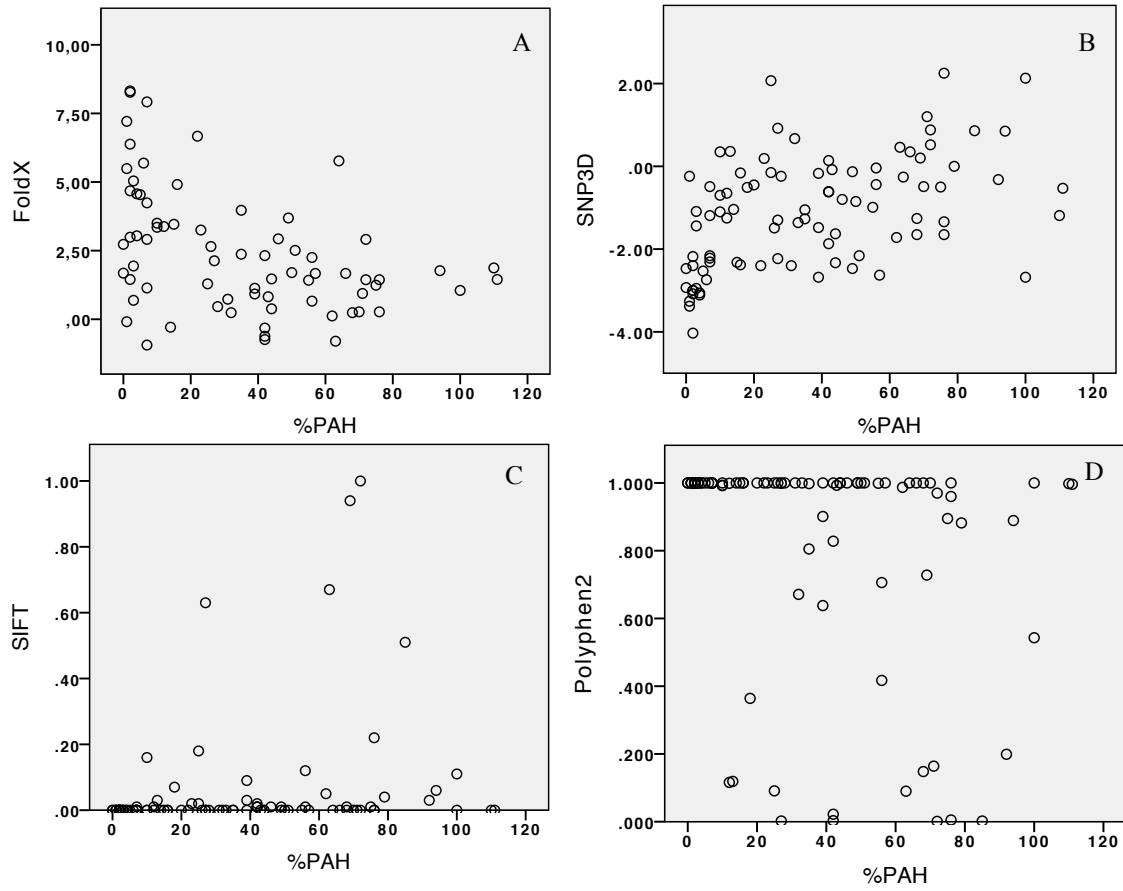

Supplement: ejhg2014114x2.pdf [file ejhg2014114x2.pdf]
