# Supplementary material
Source: PubMed Central journal article supplement (PMC4326710)

**Figure S3:** Correlation between mean residual PAH activity (%PAH) and allelic phenotype in patients from the BIOPKU database. MHP=APV8; mild PKU=APV3; classic PKU=APV1 Error bars represent the 95% confidence interval.

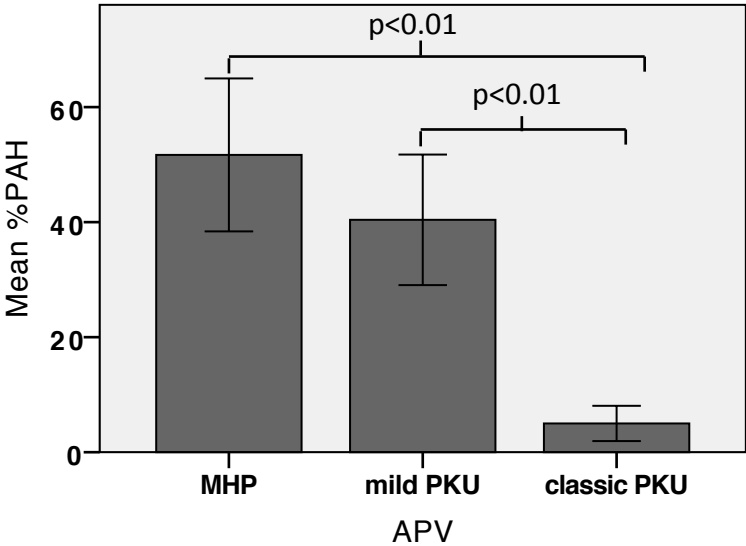

Supplement: ejhg2014114x3.pdf [file ejhg2014114x3.pdf]
