# Supplementary material
Source: PubMed Central journal article supplement (PMC4326710)
Supplement: ejhg2014114x8.pdf [file ejhg2014114x8.pdf]

Supplementary Table S3A: Equations and regression coefficients used in this study to predict disease severity

| Predicting Phenotype                           |                                           |                                                                                                               |                                           |           |                 |        |                       |                                  |
|------------------------------------------------|-------------------------------------------|---------------------------------------------------------------------------------------------------------------|-------------------------------------------|-----------|-----------------|--------|-----------------------|----------------------------------|
| Prediction for                                 | F-ratio <sup>g</sup>                      | Equation <sup>e</sup>                                                                                         | Variable                                  | B         | SE <sub>B</sub> | β      | Explained Variability | Correctly predicted <sup>f</sup> |
| Allele                                         | F(2,32) = 31.403                          | Predicted APV = 2.732 + 0.078 x %PAH – 0.349 x FoldX                                                          | Intercept                                 | 2.732     | 0.764           |        | 64.1 %                | 60.0 %                           |
|                                                |                                           |                                                                                                               | %PAH                                      | 0.078     | 0.014           | 0.660  |                       |                                  |
|                                                |                                           |                                                                                                               | FoldX                                     | -0.349    | 0.161           | -0.254 |                       |                                  |
|                                                | F(2,38) = 22.762                          | Predicted APV = 2.595 + 0.073 x %PAH + 0.526 x SNP3D                                                          | Intercept                                 | 2.595     | 0.785           |        | 52.1 %                | 65.7 %                           |
|                                                |                                           |                                                                                                               | %PAH                                      | 0.073     | 0.016           | 0.585  |                       |                                  |
|                                                |                                           |                                                                                                               | SNPs3D                                    | 0.526     | 0.279           | 0.241  |                       |                                  |
| Deleterious genotypes <sup>a</sup>             |                                           |                                                                                                               |                                           |           |                 |        | ≈ 100 %               |                                  |
| Functionally hemizygous Genotypes <sup>b</sup> | F(1,152) = 504.706                        | Predicted phenotype = 0.877 + 0.219 x APV                                                                     | Intercept                                 | 0.877     | 0.043           |        | 76.7 %                | 83.1 – 94.8 %                    |
|                                                |                                           |                                                                                                               | APV                                       | 0.219     | 0.01            | 0.877  |                       |                                  |
|                                                | F(1,143) = 57.739                         | Predicted phenotype = 0.951 + 0.02 x %PAH                                                                     | Intercept                                 | 0.951     | 0.1             |        | 32.5 %                |                                  |
|                                                |                                           |                                                                                                               | %PAH                                      | 0.02      | 0.002           | 0.574  |                       |                                  |
|                                                | F(2,134) = 10.639                         | Predicted phenotype = 2.208 + 0.162 x SNP3D – 0.136 x FoldX                                                   | Intercept                                 | 2.208     | 0.113           |        | 12.4 %                |                                  |
|                                                |                                           |                                                                                                               | SNPs3D                                    | 0.162     | 0.058           | 0.228  |                       |                                  |
| FoldX                                          |                                           |                                                                                                               | -0.136                                    | 0.043     | -0.257          |        |                       |                                  |
| Compound heterozygous genotype <sup>c</sup>    | F(1,93) = 183.498                         | Predicted phenotype = 1.062 + 0.301 x $\bar{x}_{APV}$ <sup>h</sup>                                            | Intercept                                 | 1.062     | 0.90            |        | 66.0 %                | 77.9 %                           |
|                                                |                                           |                                                                                                               | $\bar{x}_{APV}$ <sup>h</sup>              | 0.301     | 0.022           | 0.815  |                       |                                  |
|                                                | F(2,84) = 28.920                          | Predicted phenotype = 1.518 + 0.025 x $\bar{x}_{\%PAH}$ <sup>i</sup> + 0.233 x $\bar{x}_{SNP3D}$ <sup>k</sup> | Intercept                                 | 1.518     | 0.207           |        | 39.4 %                |                                  |
|                                                |                                           |                                                                                                               | $\bar{x}_{\%PAH}$ <sup>i</sup>            | 0.025     | 0.004           | 0.536  |                       |                                  |
|                                                |                                           |                                                                                                               | $\bar{x}_{SNP3D}$ <sup>k</sup>            | 0.233     | 0.081           | 0.247  |                       |                                  |
|                                                | Compound homozygous genotype <sup>d</sup> | F(1,26) = 117.001                                                                                             | Predicted phenotype = 0.998 + 0.252 x APV | Intercept | 0.998           | 0.091  |                       | 81.1 %                           |
| APV                                            |                                           |                                                                                                               |                                           | 0.252     | 0.023           | 0.905  |                       |                                  |
| F(1,29) = 27                                   |                                           | Predicted phenotype = 1.252 + 0.019 x %PAH                                                                    | Intercept                                 | 1.252     | 0.274           |        | 27.5 %                |                                  |
|                                                |                                           |                                                                                                               | %PAH                                      | 0.019     | 0.007           | 0.561  |                       |                                  |

g) F-ratio = mean sum of squares for regression / mean sum of squares for the residuals

h)  $\bar{x}_{APV}$  = average allelic phenotype = {APV (allele 1) + APV (allele 2)} / 2

i)  $\bar{x}_{\%PAH}$  = average allelic %PAH = {%PAH (allele 1) + %PAH (allele 2)} / 2

k)  $\bar{x}_{SNP3D}$  = average allelic SNPs3D value = {SNP3D (allele 1) + SNPs3D (allele 2)} / 2

Supplementary Table S3B: Equations and regression coefficients used in this study to predict BH4 response

| Predicting BH4 Response                        |                                      |                                                                      |                   |       |                 |       |                       |                                  |
|------------------------------------------------|--------------------------------------|----------------------------------------------------------------------|-------------------|-------|-----------------|-------|-----------------------|----------------------------------|
| Prediction for                                 | F-ratio <sup>g</sup>                 | Equation <sup>e</sup>                                                | Variable          | B     | SE <sub>B</sub> | β     | Explained Variability | Correctly predicted <sup>f</sup> |
| Deleterious genotypes <sup>a</sup>             |                                      |                                                                      |                   |       |                 |       |                       | ≈ 100 %                          |
| Functionally hemizygous genotypes <sup>b</sup> | F(2,75) = 51.144<br>F(1,63) = 42.998 | Predicted BH <sub>4</sub> response = 0.91 + 0.2 x APV + 0.008 x %PAH | Intercept         | 0.91  | 0.14            |       | 58.4 %                | 68.4 %                           |
|                                                |                                      |                                                                      | APV               | 0.20  | 0.03            | 0.64  |                       |                                  |
|                                                |                                      |                                                                      | %PAH              | 0.008 | 0.004           | 0.201 |                       |                                  |
| Compound heterozygous genotypes <sup>c</sup>   | F(1,63) = 42.998<br>F(1,14) = 10.404 | Predicted BH <sub>4</sub> response = 1.44 + 0.3 x $\bar{x}_{APV}^h$  | Intercept         | 1.44  | 0.17            |       | 39.6 %                | 50.0 %                           |
|                                                |                                      |                                                                      | $\bar{x}_{APV}^h$ | 0.30  | 0.05            | 0.60  |                       |                                  |
| Homozygous genotypes <sup>d</sup>              | F(1,14) = 10.404<br>F(1,18) = 8.377  | Predicted BH <sub>4</sub> response = 1.79 + 0.021 x %PAH             | Intercept         | 1.79  | 0.28            |       | 38.5 %                | 81.3 %                           |
|                                                |                                      |                                                                      | %PAH              | 0.021 | 0.006           | 0.653 |                       |                                  |
|                                                | F(1,18) = 8.377                      | Predicted BH <sub>4</sub> response = 1.63 + 0.19 x APV               | Intercept         | 1.63  | 0.27            |       | 28.0 %                |                                  |
|                                                |                                      |                                                                      | APV               | 0.19  | 0.07            | 0.56  |                       |                                  |

Multiple regression analysis was run to predict APV from FoldX, PolyPhen-2, SNPs3D, SIFT Blist and %PAH values. For prediction of disease phenotype, we determined the average phenotype ( $\bar{x}_{PHENO}$ ) for each genotype.  $\bar{x}_{PHENO}$  was a linear variable defined as (3 x MHP patients + 2 x mild PKU patients + 1 x classic PKU patients) / (all patients within genotype) ranging from 1 (classic PKU) to 3 (MHP) representing the genotype's phenotype tendency. Similarly, average BH<sub>4</sub> response ( $\bar{x}_{BH4}$ ) was determined in all genotypes with at least two patients where response was known.  $\bar{x}_{BH4}$  = (3x responders + 2x slow responders + 1x non-responders) / (all patients within genotype) was a linear variable ranging from 1 (non-responding) to 3 (fast responding) representing the genotype's response tendency. Potentially predictive variables were (a) genotype in deleterious null-null cases, (b) allelic values of the non-null allele in hemizygous patients, (c) averaged allelic values in compound heterozygotes and (d) values of either allele in homozygous genotypes. (e) Equations from multiple regression analysis were applied to the collective. (f) Predicted phenotype and BH<sub>4</sub> response were considered correct if they were less than 0.5 away from de facto  $\bar{x}_{PHENO}$  and  $\bar{x}_{BH4}$ . In the case of functionally hemizygous genotypes the difference between predicted phenotype and  $\bar{x}_{PHENO}$  was <0.50 in 128 cases (83.1 %), ≈ 0.50 in 18 cases (11.7 %) and > 0.50 in 8 cases (5.2 %). Therefore the equation correctly predicted  $\bar{x}_{PHENO}$  in 83.1 – 94.8 % of all hemizygous genotypes.
