# Supplementary material
Source: PubMed Central journal article supplement (PMC4326710)

Figure S4: Expected and actual number of mutations per residue (mpr) within protein

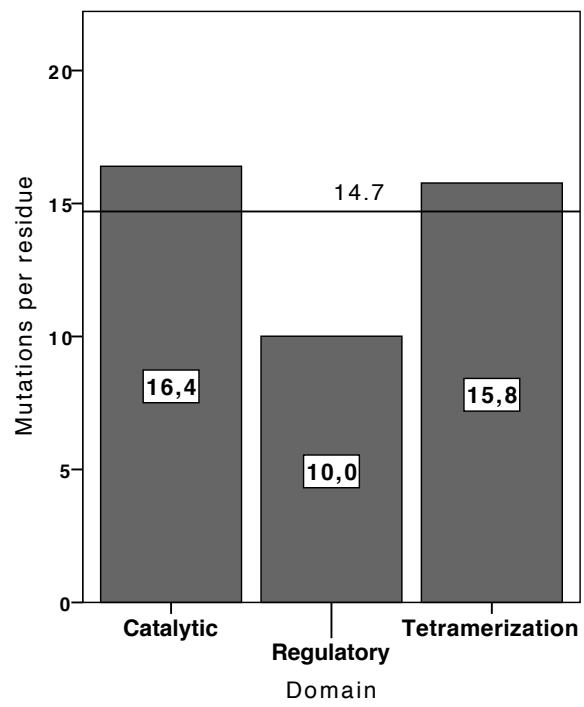

Supplement: ejhg2014114x4.pdf [file ejhg2014114x4.pdf]

Figure S5: Expected and actual number of mutations per nucleotide (mpn) within the coding

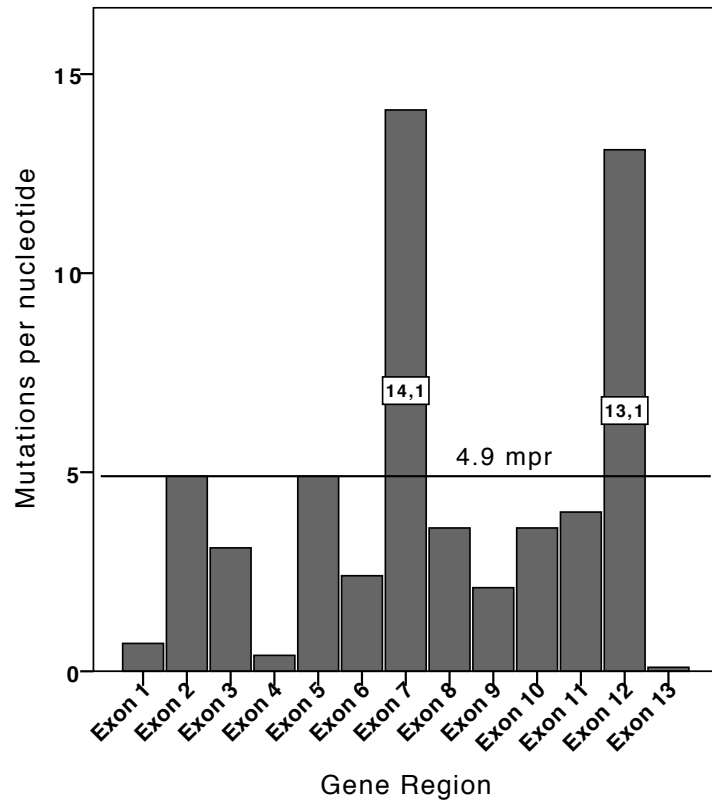

Supplement: ejhg2014114x5.pdf [file ejhg2014114x5.pdf]
